# Supplementary material for: Brain Metabolic Profile after Intranasal vs. Intraperitoneal Clomipramine Treatment in Rats with Ultrasound Model of Depression
Source: MDPI journal article supplement (doi:10.3390/ijms22179598), 2021-09-04
Supplement: s1 [file s1]

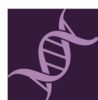

## Supplementary files

### Principal component analysis

#### Hippocampus

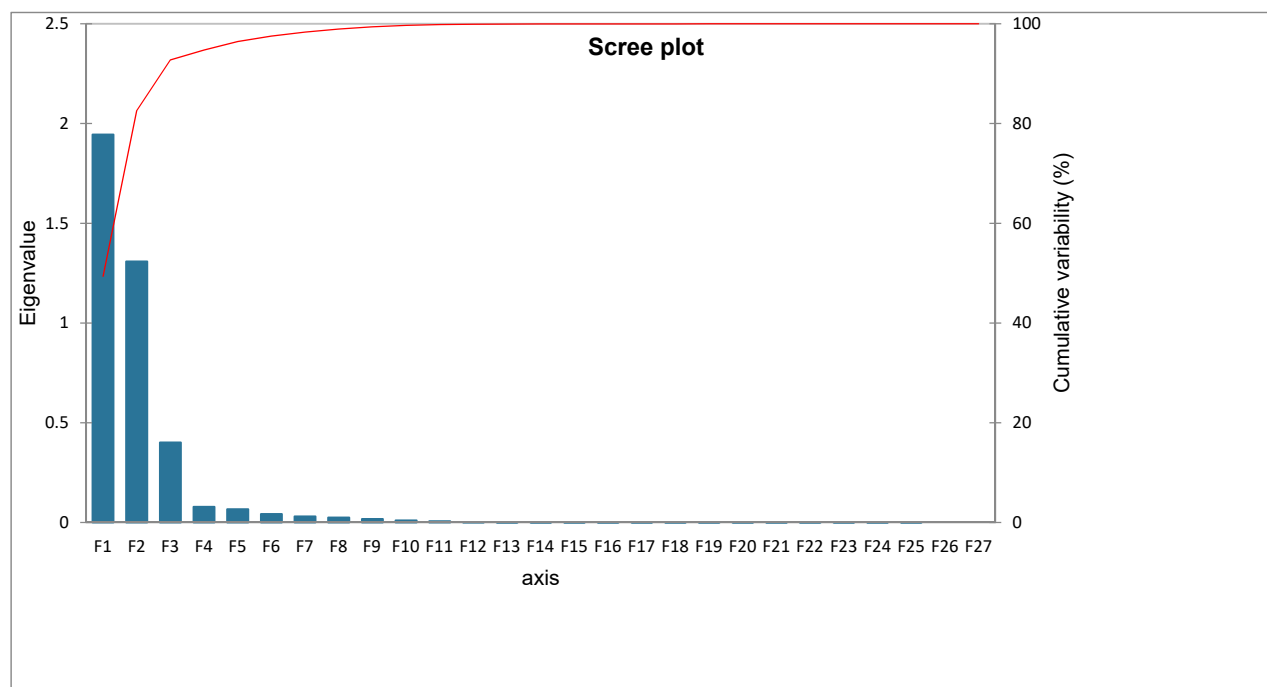

Figure S1. Scree-plot of PCA of number factors

#### Frontal cortex

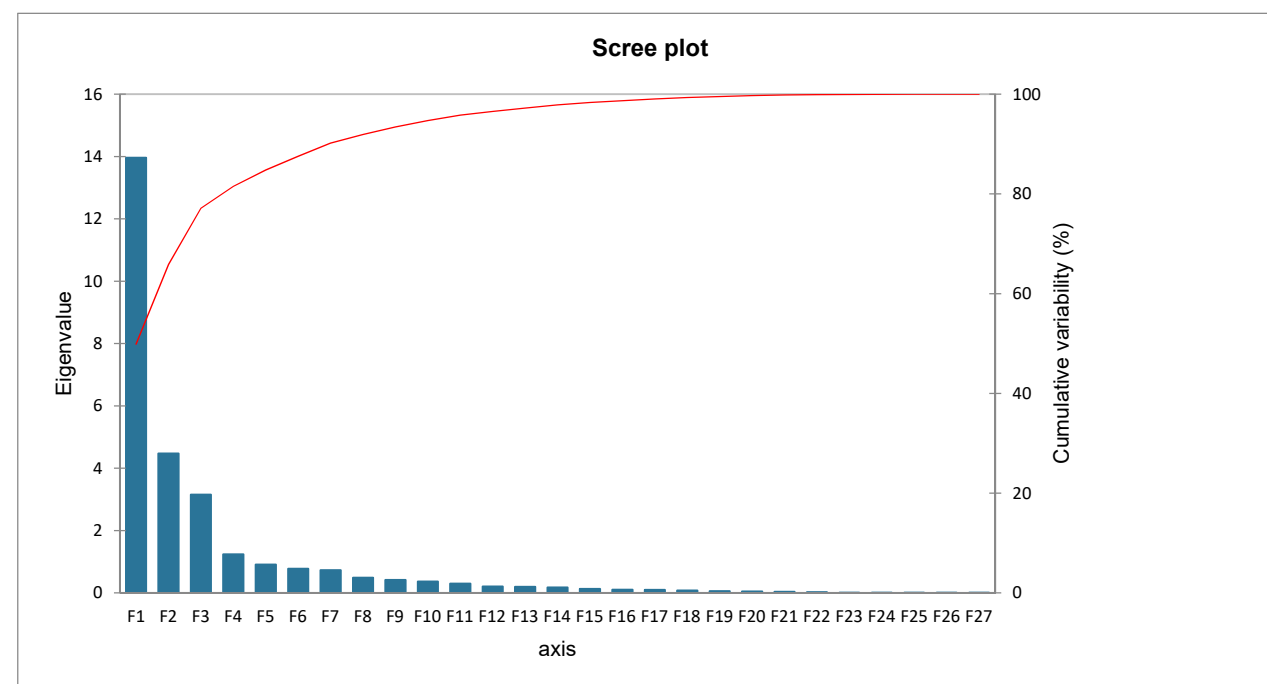

Figure S2. Scree-plot of PCA number factors in frontal cortex

## Heatmaps

## Frontal cortex

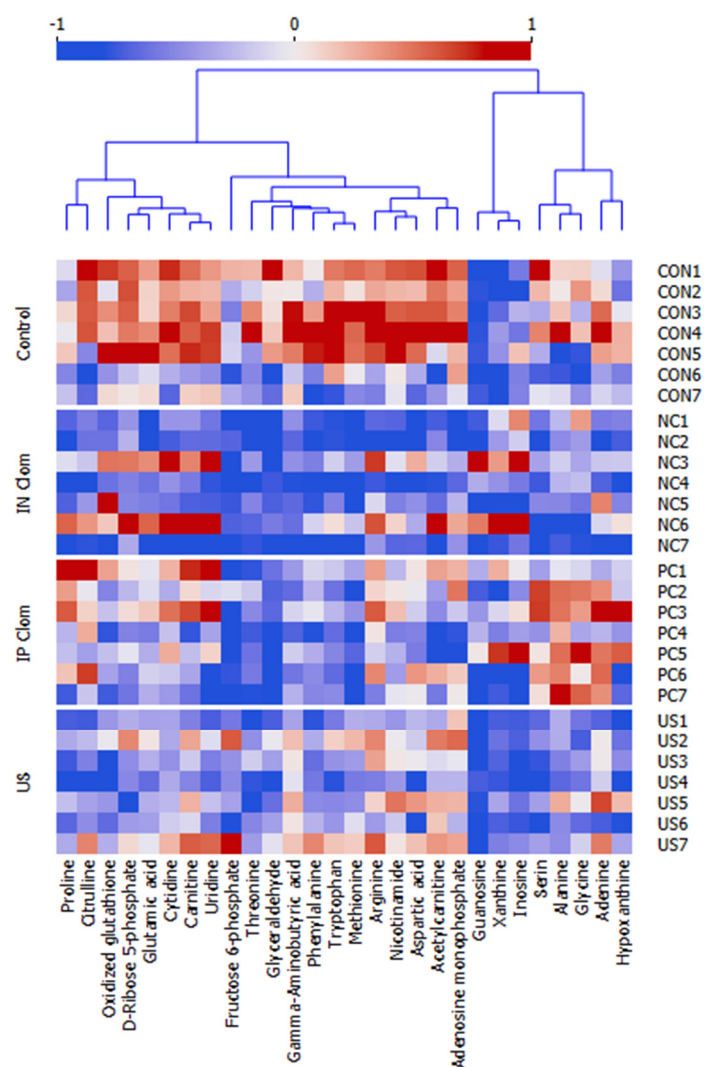

Figure S3. Clustered heatmap of metabolites in the frontal cortex of individual rat

| Metabolites in the frontal cortex |                         | Control | IN Clom | IP Clom | US   | Mann-Whitney pairwise comparison <i>p</i> -value |                   |                   |              |              |                   |
|-----------------------------------|-------------------------|---------|---------|---------|------|--------------------------------------------------|-------------------|-------------------|--------------|--------------|-------------------|
|                                   |                         |         |         |         |      | Control - US                                     | Control - IN Clom | Control - IP Clom | IN Clom - US | IP Clom - US | IN Clom - IP Clom |
|                                   | Citrulline              | 0.44    | 0.33    | 0.45    | 0.33 |                                                  |                   |                   |              |              |                   |
|                                   | Serin                   | 0.31    | 0.23    | 0.32    | 0.24 |                                                  | 0.020             |                   |              |              |                   |
|                                   | Hypoxanthine            | 0.13    | 0.11    | 0.13    | 0.10 |                                                  | 0.003             | 0.024             | 0.026        | 0.038        |                   |
|                                   | Adenine                 | 0.09    | 0.07    | 0.09    | 0.08 | 0.038                                            | 0.002             | 0.011             |              |              |                   |
|                                   | Alanine                 | 0.11    | 0.08    | 0.14    | 0.09 |                                                  |                   |                   |              | 0.002        | 0.002             |
|                                   | Proline                 | 0.85    | 0.70    | 0.95    | 0.69 |                                                  |                   |                   |              |              |                   |
|                                   | Glycine                 | 0.00    | 0.00    | 0.00    | 0.00 | 0.026                                            | 0.004             | 0.007             |              |              |                   |
|                                   | Guanosine               | 0.00    | 0.00    | 0.00    | 0.00 |                                                  |                   |                   |              | 0.004        | 0.012             |
|                                   | Xanthine                | 0.02    | 0.04    | 0.04    | 0.02 |                                                  |                   |                   |              |              |                   |
|                                   | Inosine                 | 0.01    | 0.03    | 0.02    | 0.01 |                                                  |                   |                   |              | 0.026        | 0.026             |
|                                   | D-Ribose 5-phosphate    | 0.03    | 0.02    | 0.01    | 0.01 |                                                  |                   |                   |              |              |                   |
|                                   | Oxidized glutathione    | 0.11    | 0.08    | 0.07    | 0.06 |                                                  |                   |                   |              |              |                   |
|                                   | Uridine                 | 0.03    | 0.02    | 0.02    | 0.02 |                                                  |                   |                   | 0.026        |              |                   |
|                                   | Cytidine                | 1.17    | 0.92    | 1.01    | 0.89 |                                                  |                   |                   |              |              |                   |
|                                   | Aspartic acid           | 0.39    | 0.26    | 0.33    | 0.31 | 0.007                                            | 0.004             |                   |              | 0.003        | 0.002             |
|                                   | Phenylalanine           | 0.31    | 0.17    | 0.23    | 0.23 |                                                  | 0.002             |                   | 0.020        |              |                   |
|                                   | Arginine                | 0.20    | 0.15    | 0.18    | 0.17 |                                                  | 0.038             |                   |              |              | 0.038             |
|                                   | Carnitine               | 1.12    | 0.83    | 0.92    | 0.94 |                                                  | 0.017             | 0.017             |              |              |                   |
|                                   | Nicotinamide            | 4.13    | 2.81    | 3.26    | 3.42 | 0.017                                            | 0.004             | 0.026             |              |              |                   |
|                                   | Tryptophan              | 0.58    | 0.31    | 0.33    | 0.37 |                                                  | 0.002             | 0.002             | 0.026        | 0.011        |                   |
|                                   | Threonine               | 1.39    | 0.90    | 0.98    | 0.97 | 0.002                                            |                   | 0.017             |              |              |                   |
|                                   | Glutamic acid           | 4.76    | 3.40    | 3.83    | 3.63 | 0.026                                            |                   |                   |              |              |                   |
|                                   | Adenosine monophosphate | 2.84    | 1.61    | 2.06    | 2.40 |                                                  | 0.017             |                   |              |              | 0.038             |
|                                   | Gamma-Aminobutyric acid | 1.71    | 0.74    | 0.98    | 1.41 | 0.011                                            |                   | 0.026             |              |              |                   |
|                                   | Methionine              | 0.09    | 0.04    | 0.04    | 0.06 |                                                  | 0.001             | 0.002             | 0.001        | 0.004        |                   |
|                                   | Glyceraldehyde          | 0.02    | 0.00    | 0.00    | 0.01 | 0.007                                            |                   | 0.011             |              |              |                   |
|                                   | Fructose 6-phosphate    | 0.00    | 0.00    | 0.00    | 0.00 |                                                  |                   |                   |              |              |                   |
|                                   | Acetylcarnitine         | 0.53    | 0.40    | 0.39    | 0.50 | 0.017                                            |                   |                   |              | 0.017        |                   |

Figure S4. Clustered mean frontal cortex concentration of metabolites in animal groups with pairwise comparison between groups

## Hippocampus

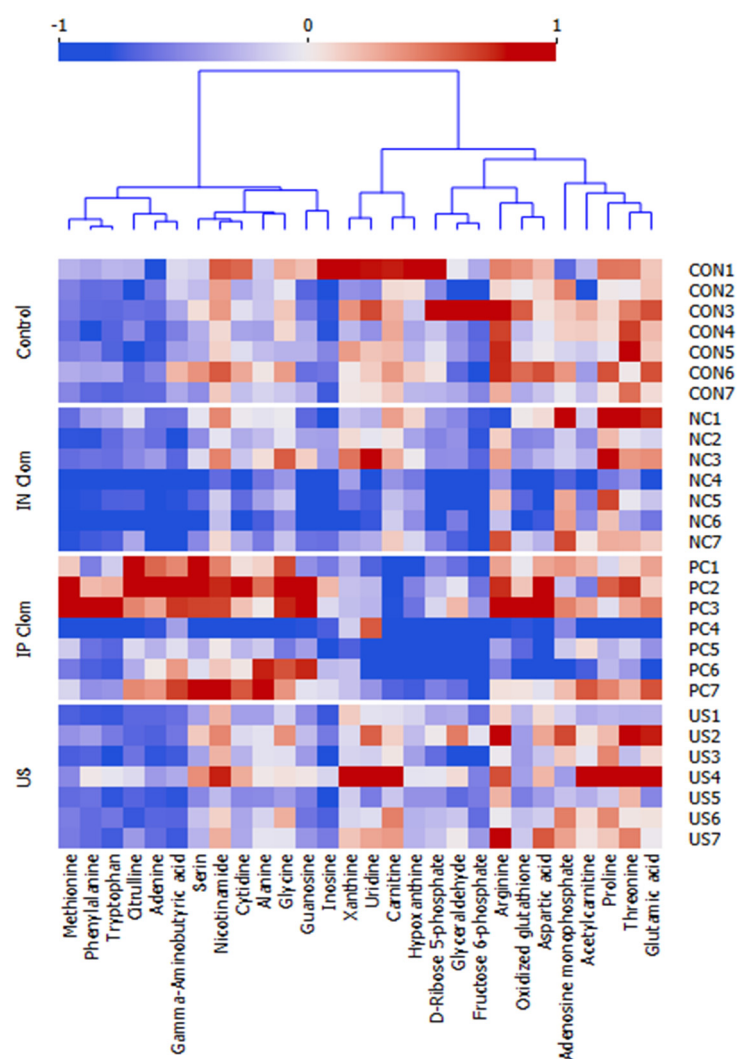

Figure S5. Clustered heatmap of metabolites in the frontal cortex of individual rat

| Metabolites in the hippocampus |  | Control | IN Clom | IP Clom | US   | Mann-Whitney pairwise comparison <i>p</i> -value |                   |                   |              |              |                   |
|--------------------------------|--|---------|---------|---------|------|--------------------------------------------------|-------------------|-------------------|--------------|--------------|-------------------|
|                                |  |         |         |         |      | Control - US                                     | Control - IN Clom | Control - IP Clom | IN Clom - US | IP Clom - US | IN Clom - IP Clom |
| Aspartic acid                  |  | 0.38    | 0.35    | 0.35    | 0.21 |                                                  | 0.007             |                   | 0.011        |              |                   |
| Nicotinamide                   |  | 4.13    | 3.97    | 3.88    | 3.11 |                                                  |                   |                   |              |              |                   |
| Oxidized glutathione           |  | 0.20    | 0.14    | 0.17    | 0.08 | 0.011                                            | 0.017             |                   |              |              |                   |
| Glutamic acid                  |  | 5.00    | 4.79    | 4.12    | 3.41 |                                                  |                   |                   |              |              |                   |
| Uridine                        |  | 0.05    | 0.05    | 0.04    | 0.03 |                                                  |                   |                   |              |              |                   |
| Threonine                      |  | 1.14    | 1.19    | 0.95    | 0.82 |                                                  |                   |                   |              |              |                   |
| Xanthine                       |  | 0.13    | 0.14    | 0.10    | 0.07 |                                                  |                   |                   |              | 0.001        |                   |
| Arginine                       |  | 0.21    | 0.20    | 0.16    | 0.14 |                                                  | 0.026             |                   |              |              |                   |
| D-Ribose 5-phosphate           |  | 0.06    | 0.05    | 0.03    | 0.02 |                                                  | 0.002             | 0.011             | 0.011        |              |                   |
| Hypoxanthine                   |  | 0.16    | 0.13    | 0.07    | 0.11 |                                                  |                   | 0.001             |              | 0.001        | 0.001             |
| Carnitine                      |  | 2.15    | 2.20    | 0.64    | 1.56 |                                                  |                   | 0.001             |              | 0.001        | 0.001             |
| Adenosine monophosphate        |  | 1.95    | 1.95    | 1.41    | 1.42 |                                                  |                   |                   |              |              |                   |
| Fructose 6-phosphate           |  | 0.01    | 0.01    | 0.00    | 0.00 |                                                  |                   |                   | 0.011        |              |                   |
| Proline                        |  | 1.05    | 1.05    | 0.79    | 0.85 |                                                  |                   |                   |              |              |                   |
| Acetylcarnitine                |  | 0.89    | 1.14    | 0.89    | 0.70 |                                                  |                   |                   | 0.029        |              |                   |
| Glyceraldehyde                 |  | 0.02    | 0.03    | 0.02    | 0.02 |                                                  |                   |                   |              |              |                   |
| Guanosine                      |  | 0.00    | 0.01    | 0.01    | 0.00 |                                                  |                   |                   |              |              |                   |
| Glycine                        |  | 0.00    | 0.00    | 0.00    | 0.00 |                                                  |                   |                   |              |              |                   |
| Cytidine                       |  | 1.85    | 1.60    | 1.88    | 1.10 |                                                  |                   |                   |              |              | 0.049             |
| Alanine                        |  | 0.15    | 0.14    | 0.16    | 0.11 |                                                  |                   |                   |              |              |                   |
| Serin                          |  | 0.37    | 0.35    | 0.44    | 0.23 |                                                  |                   |                   |              |              |                   |
| Phenylalanine                  |  | 0.34    | 0.34    | 0.45    | 0.20 |                                                  |                   |                   |              |              |                   |
| Methionine                     |  | 0.11    | 0.09    | 0.18    | 0.05 |                                                  | 0.001             |                   | 0.017        |              | 0.017             |
| Tryptophan                     |  | 0.54    | 0.49    | 0.78    | 0.33 |                                                  |                   |                   |              |              |                   |
| Gamma-Aminobutyric acid        |  | 2.72    | 1.50    | 3.69    | 0.95 | 0.007                                            | 0.001             | 0.017             |              | 0.001        | 0.001             |
| Inosine                        |  | 0.04    | 0.05    | 0.07    | 0.04 |                                                  |                   |                   |              |              | 0.038             |
| Citrulline                     |  | 0.59    | 0.66    | 1.11    | 0.54 |                                                  |                   | 0.017             |              |              | 0.038             |
| Adenine                        |  | 0.11    | 0.10    | 0.19    | 0.09 |                                                  |                   | 0.017             |              | 0.017        | 0.004             |

Figure S6. Clustered mean hippocampus concentration of metabolites in animal groups with pairwise comparison between groups

Table S1. Results from the pathway analysis; Total - the total number of compounds in the pathway; Hits - the actually matched number from the user uploaded data; The *p* - the original *p*-value calculated from the enrichment analysis; Holm *p* - the *p*-value adjusted by Holm-Bonferroni method; FDR - the *p*-value adjusted using False Discovery Rate; Impact - the pathway impact value calculated from pathway topology analysis.

| Pathway Name                                                                                       | Total | Hits | <i>p</i>  | -log( <i>p</i> ) | Holm <i>p</i> | FDR    | Impact |
|----------------------------------------------------------------------------------------------------|-------|------|-----------|------------------|---------------|--------|--------|
| A. Metabolic pathways in frontal cortex related to depression-like behaviors induced by US stress. |       |      |           |                  |               |        |        |
| Tryptophan metabolism                                                                              | 41    | 1    | 4.4473E-5 | 4.3519           | 0.0012        | 0.0012 | 0.1431 |

|                                                                                                              |           |    |           |        |        |        |        |
|--------------------------------------------------------------------------------------------------------------|-----------|----|-----------|--------|--------|--------|--------|
| Aminoacyl-tRNA biosynthesis                                                                                  | <u>48</u> | 10 | 9.3534E-4 | 3.029  | 0.0243 | 0.0026 | 0.1667 |
| Alanine, aspartate and glutamate metabolism                                                                  | <u>28</u> | 4  | 0.0011    | 2.9426 | 0.0285 | 0.0026 | 0.5072 |
| Arginine and proline metabolism                                                                              | <u>38</u> | 4  | 0.0011    | 2.9414 | 0.0285 | 0.0026 | 0.2455 |
| Arginine biosynthesis                                                                                        | <u>14</u> | 4  | 0.0012    | 2.9381 | 0.0285 | 0.0026 | 0.4213 |
| D-Glutamine and D-glutamate metabolism                                                                       | <u>6</u>  | 1  | 0.0012    | 2.9331 | 0.0285 | 0.0026 | 0.5    |
| Pentose phosphate pathway                                                                                    | <u>21</u> | 1  | 0.0052    | 2.2855 | 0.0777 | 0.0108 | 0.185  |
| Nicotinate and nicotinamide metabolism                                                                       | <u>15</u> | 2  | 0.0061    | 2.2133 | 0.0857 | 0.0118 | 0.1943 |
| Glycine, serine and threonine metabolism                                                                     | <u>34</u> | 2  | 0.0344    | 1.4635 | 0.432  | 0.058  | 0.2307 |
| <b>B. Metabolic pathways in hippocampus related to antidepressant effect of intraperitoneal clomipramine</b> |           |    |           |        |        |        |        |
| Purine metabolism                                                                                            | <u>66</u> | 7  | 0.0216    | 1.665  | 0.6056 | 0.4853 | 0.1305 |
